# Supplementary material for: Effect of Bifidobacterium breve on the Intestinal Microbiota of Coeliac Children on a Gluten Free Diet: A Pilot Study
Source: PubMed Central journal article supplement (PMC5084046; doi:10.3390/nu8100660), 2016-10-22
Supplement: nutrients-08-00660-s001.pdf [file nutrients-08-00660-s001.pdf]

# Supplementary Materials: Effect of *Bifidobacterium breve* on the Intestinal Microbiota of Coeliac Children on a Gluten Free Diet: A Pilot Study

Andrea Quagliariello, Irene Aloisio, Nicole Bozzi Cionci, Donata Luiselli, Giuseppe D'Auria, Lúcia Martínez-Priego, David Pérez-Villarroya, Tomaz Langerholc, Maša Primec, Dušana Mičetić-Turk and Diana Di Gioia

Table S1. Description of the study groups at the beginning of intervention.

|                    | Placebo Group | Probiotic Group | Control Group |
|--------------------|---------------|-----------------|---------------|
| No. patients       | 20            | 20              | 16            |
| Sex (M/F)          | 8/12          | 6/14            | 7/9           |
| Age (year)         | 10.53 ± 3.87  | 10.23 ± 3.18    | 8.80 ± 5.12   |
| Time on GFD (year) | 7.16 ± 4.98   | 5.43 ± 3.40     | -             |
| Compliance to GDF  | 80%           | 90%             | -             |

Table S2. *p*-values among groups.

| Domain   | Phylum         | CD-Control | CD-Probiotic T1 | Control-Probiotic T1 |
|----------|----------------|------------|-----------------|----------------------|
| Archaea  | Euryarchaeota  | 0.000079   | n.s.            | 0.00009              |
| Bacteria | Actinobacteria | 0.0036     | n.s.            | n.s.                 |
| Bacteria | Firmicutes     | 0.0022     | 0.0022          | n.s.                 |

Table S3. Mean values of relative abundance with standard deviation.

| Phylum         | CD           | Control   | Probiotic T1 |
|----------------|--------------|-----------|--------------|
| Euryarchaeota  | 0.01 ± 0.003 | 0.4 ± 0.5 | 0.011 ± 0.02 |
| Actinobacteria | 4 ± 3        | 8 ± 5     | 6.25 ± 4     |
| Firmicutes     | 47 ± 15      | 55 ± 17   | 54 ± 18      |

Table S4. *p*-values among groups.

| Domain   | Phylum         | Control-Probiotic T0 | Control-Probiotic T1 | Probiotic T0-Probiotic T1 |
|----------|----------------|----------------------|----------------------|---------------------------|
| Archaea  | Euryarchaeota  | 0.0000195            | 0.00009              | n.s.                      |
| Bacteria | Actinobacteria | 0.0021               | n.s.                 | n.s.                      |
| Bacteria | Firmicutes     | 0.0003926            | n.s.                 | 0.000536                  |
| Bacteria | Proteobacteria | 0.0031               | 0.0018               | n.s.                      |

Table S5. Mean values of relative abundance with standard deviation.

| Phylum         | Control   | Probiotic T0 | Probiotic T1 |
|----------------|-----------|--------------|--------------|
| Euryarchaeota  | 0.4 ± 0.5 | 0.018 ± 0.03 | 0.011 ± 0.02 |
| Actinobacteria | 8 ± 5     | 4.8 ± 3      | 6.25 ± 4     |
| Firmicutes     | 55 ± 17   | 48.2 ± 17    | 54 ± 18      |
| Proteobacteria | 12 ± 6    | 6.23 ± 5     | 5.134 ± 4.8  |

**Table S6.** *p*-values among groups.

| <b>Domain</b> | <b>Phylum</b>  | <b>Control-Probiotic T0</b> | <b>Control-Probiotic T1</b> | <b>Probiotic T0-Probiotic T1</b> |
|---------------|----------------|-----------------------------|-----------------------------|----------------------------------|
| Archaea       | Euryarchaeota  | 0.0000195                   | 0.00009                     | n.s.                             |
| Bacteria      | Actinobacteria | 0.0021                      | n.s.                        | n.s.                             |
| Bacteria      | Firmicutes     | 0.0003926                   | n.s.                        | 0.000536                         |
| Bacteria      | Proteobacteria | 0.0031                      | 0.0018                      | n.s.                             |

**Table S7.** Mean values of relative abundance with standard deviation.

| <b>Family</b>               | <b>Control</b>   | <b>Probiotic T0</b> | <b>Probiotic T1</b> |
|-----------------------------|------------------|---------------------|---------------------|
| Unclass Deltaproteobacteria | 0.0001 ± 0.00065 | 0.02 ± 0.005        | 0.152 ± 0.0039      |
| Lactobacillaceae            | 0.028 ± 0.0035   | 0.005 ± 0.00065     | 0.019 ± 0.006       |
| Gracilibacteraceae          | 0.0008 ± 0.00005 | 0.003 ± 0.00022     | 0.0123 ± 0.0048     |
| Methanobacteriaceae         | 0.363 ± 0.1      | 0.01 ± 0.002        | 0.0095 ± 0.0008     |
